# Supplementary material for: Prevalence, Contamination Level, and Associated Factors of Methicillin‐Resistant Staphylococcus aureus in Raw Cow Milk at Selected Districts of Gamo Zone, Southern Ethiopia
Source: Hindawi journal article supplement (doi:10.1155/2023/6238754), 2023-01-01
Supplement: f1 [file 6238754.f1.pdf]

**Table data 1:The entire necessary datum**

| No | agroecology | TVC count                                        | meanlogTVC T |
|----|-------------|--------------------------------------------------|--------------|
| 1  | highland    | with in average acceptability threshold/marginal | 5.13         |
| 2  | highland    | satisfactory/good for consumption/GMP            | 4.01         |
| 3  | highland    | with in average acceptability threshold/marginal | 6.92         |
| 4  | highland    | satisfactory/good for consumption/GMP            | 2.23         |
| 5  | highland    | with in average acceptability threshold/marginal | 6.66         |
| 6  | highland    | with in average acceptability threshold/marginal | 6.02         |
| 7  | highland    | satisfactory/good for consumption/GMP            | 4.23         |
| 8  | highland    | with in average acceptability threshold/marginal | 5.99         |
| 9  | highland    | satisfactory/good for consumption/GMP            | 4.11         |
| 10 | highland    | with in average acceptability threshold/marginal | 6.3          |
| 11 | highland    | satisfactory/good for consumption/GMP            | 3.23         |
| 12 | highland    | satisfactory/good for consumption/GMP            | 3.08         |
| 13 | highland    | with in average acceptability threshold/marginal | 6.43         |
| 14 | highland    | satisfactory/good for consumption/GMP            | 2.92         |
| 15 | highland    | with in average acceptability threshold/marginal | 6.94         |
| 16 | highland    | with in average acceptability threshold/marginal | 5.89         |
| 17 | highland    | satisfactory/good for consumption/GMP            | 4.3          |
| 18 | highland    | satisfactory/good for consumption/GMP            | 4.86         |
| 19 | highland    | with in average acceptability threshold/marginal | 6.57         |
| 20 | highland    | with in average acceptability threshold/marginal | 6.45         |
| 21 | highland    | satisfactory/good for consumption/GMP            | 4.12         |
| 22 | highland    | with in average acceptability threshold/marginal | 6.83         |
| 23 | highland    | with in average acceptability threshold/marginal | 5.01         |
| 24 | highland    | unsatisfactory                                   | 7            |
| 25 | highland    | satisfactory/good for consumption/GMP            | 4.6          |
| 26 | highland    | satisfactory/good for consumption/GMP            | 5            |
| 27 | highland    | satisfactory/good for consumption/GMP            | 4.9          |
| 28 | highland    | with in average acceptability threshold/marginal | 5.02         |
| 29 | highland    | unsatisfactory                                   | 8            |
| 30 | highland    | satisfactory/good for consumption/GMP            | 4.87         |
| 31 | highland    | unsatisfactory                                   | 7.05         |
| 32 | highland    | satisfactory/good for consumption/GMP            | 4.07         |
| 33 | highland    | with in average acceptability threshold/marginal | 6.1          |
| 34 | highland    | unsatisfactory                                   | 7.23         |
| 35 | highland    | unsatisfactory                                   | 8.01         |
| 36 | highland    | with in average acceptability threshold/marginal | 6.03         |
| 37 | highland    | with in average acceptability threshold/marginal | 5.78         |
| 38 | highland    | with in average acceptability threshold/marginal | 6.2          |
| 39 | highland    | unsatisfactory                                   | 7.12         |
| 40 | highland    | unsatisfactory                                   | 7.3          |
| 41 | highland    | with in average acceptability threshold/marginal | 6.34         |
| 42 | highland    | satisfactory/good for consumption/GMP            | 2.65         |
| 43 | highland    | with in average acceptability threshold/marginal | 5.8          |
| 44 | highland    | satisfactory/good for consumption/GMP            | x>8.7        |
| 45 | highland    | with in average acceptability threshold/marginal | 5.31         |
| 46 | highland    | with in average acceptability threshold/marginal | 6.2          |
| 47 | highland    | satisfactory/good for consumption/GMP            | 4.1          |

|    |          |                                                  |           |
|----|----------|--------------------------------------------------|-----------|
| 48 | highland | with in average acceptability threshold/marginal | 5.76      |
| 49 | highland | satisfactory/good for consumption/GMP            | 4.67      |
| 50 | highland | unsatisfactory                                   | 7.02      |
| 51 | highland | with in average acceptability threshold/marginal | 5.77      |
| 52 | highland | with in average acceptability threshold/marginal | 5.73      |
| 53 | highland | with in average acceptability threshold/marginal | 6.02      |
| 54 | highland | satisfactory/good for consumption/GMP            | 4.5       |
| 55 | highland | unsatisfactory                                   | 7.2       |
| 56 | highland | with in average acceptability threshold/marginal | 6.1       |
| 57 | highland | with in average acceptability threshold/marginal | 6.7       |
| 58 | highland | with in average acceptability threshold/marginal | 6.23      |
| 59 | highland | with in average acceptability threshold/marginal | 5.11      |
| 60 | highland | satisfactory/good for consumption/GMP            | 3.87      |
| 61 | lowland  | satisfactory/good for consumption/GMP            | 3.53      |
| 62 | lowland  | with in average acceptability threshold/marginal | 5.88      |
| 63 | lowland  | satisfactory/good for consumption/GMP            | 4.22      |
| 64 | lowland  | with in average acceptability threshold/marginal | 6.15      |
| 65 | lowland  | satisfactory/good for consumption/GMP            | 2.12      |
| 66 | lowland  | with in average acceptability threshold/marginal | 6.65      |
| 67 | lowland  | satisfactory/good for consumption/GMP            | 4.12      |
| 68 | lowland  | with in average acceptability threshold/marginal | 5.74      |
| 69 | lowland  | satisfactory/good for consumption/GMP            | 2.34      |
| 70 | lowland  | with in average acceptability threshold/marginal | 6.43      |
| 71 | lowland  | satisfactory/good for consumption/GMP            | 1.09      |
| 72 | lowland  | satisfactory/good for consumption/GMP            | 3.12      |
| 73 | lowland  | with in average acceptability threshold/marginal | 5.78      |
| 74 | lowland  | satisfactory/good for consumption/GMP            | 4.01      |
| 75 | lowland  | unsatisfactory                                   | 8.52      |
| 76 | lowland  | unsatisfactory                                   | 7.45      |
| 77 | lowland  | with in average acceptability threshold/marginal | 6.11      |
| 78 | lowland  | satisfactory/good for consumption/GMP            | 4.22      |
| 79 | lowland  | with in average acceptability threshold/marginal | 5.81      |
| 80 | lowland  | with in average acceptability threshold/marginal | 6.43      |
| 81 | lowland  | satisfactory/good for consumption/GMP            | 2.02      |
| 82 | lowland  | with in average acceptability threshold/marginal | 5.32      |
| 83 | lowland  | with in average acceptability threshold/marginal | 6.09      |
| 84 | lowland  | satisfactory/good for consumption/GMP            | 4.23      |
| 85 | lowland  | with in average acceptability threshold/marginal | 6.98      |
| 86 | lowland  | with in average acceptability threshold/marginal | 5.87      |
| 87 | lowland  | unsatisfactory                                   | 8.23      |
| 88 | lowland  | satisfactory/good for consumption/GMP            | 1.23      |
| 89 | lowland  | satisfactory/good for consumption/GMP            | 6.7<x?8.7 |
| 90 | lowland  | unsatisfactory                                   | 7.98      |
| 91 | lowland  | satisfactory/good for consumption/GMP            | 4.11      |
| 92 | lowland  | with in average acceptability threshold/marginal | 5.85      |
| 93 | lowland  | with in average acceptability threshold/marginal | 5.92      |
| 94 | lowland  | satisfactory/good for consumption/GMP            | 3.31      |
| 95 | lowland  | satisfactory/good for consumption/GMP            | 3.12      |
| 96 | lowland  | unsatisfactory                                   | 7.99      |
| 97 | lowland  | with in average acceptability threshold/marginal | 6.03      |

|     |         |                                                  |           |
|-----|---------|--------------------------------------------------|-----------|
| 98  | lowland | with in average acceptability threshold/marginal | 5.11      |
| 99  | lowland | satisfactory/good for consumption/GMP            | 4.99      |
| 100 | lowland | with in average acceptability threshold/marginal | 6.23      |
| 101 | lowland | unsatisfactory                                   | 8.09      |
| 102 | lowland | with in average acceptability threshold/marginal | 6.09      |
| 103 | lowland | unsatisfactory                                   | 7.14      |
| 104 | lowland | with in average acceptability threshold/marginal | 6.23      |
| 105 | lowland | with in average acceptability threshold/marginal | 6.22      |
| 106 | lowland | satisfactory/good for consumption/GMP            | 4.99      |
| 107 | lowland | satisfactory/good for consumption/GMP            | 4.44      |
| 108 | lowland | with in average acceptability threshold/marginal | 5.76      |
| 109 | lowland | unsatisfactory                                   | 7         |
| 110 | lowland | satisfactory/good for consumption/GMP            | 3.71      |
| 111 | lowland | satisfactory/good for consumption/GMP            | 2.03      |
| 112 | lowland | with in average acceptability threshold/marginal | 5.93      |
| 113 | lowland | satisfactory/good for consumption/GMP            | 3.23      |
| 114 | lowland | satisfactory/good for consumption/GMP            | 3.45      |
| 115 | lowland | satisfactory/good for consumption/GMP            | 4.88      |
| 116 | lowland | with in average acceptability threshold/marginal | 5.77      |
| 117 | lowland | satisfactory/good for consumption/GMP            | 5         |
| 118 | lowland | with in average acceptability threshold/marginal | 5.01      |
| 119 | lowland | with in average acceptability threshold/marginal | 6.2       |
| 120 | lowland | unsatisfactory                                   | 7.66      |
| 121 | lowland | satisfactory/good for consumption/GMP            | 2.1       |
| 122 | lowland | with in average acceptability threshold/marginal | 6.14      |
| 123 | lowland | satisfactory/good for consumption/GMP            | 3.03      |
| 124 | lowland | unsatisfactory                                   | 8         |
| 125 | lowland | satisfactory/good for consumption/GMP            | 6.7<x?8.7 |
| 126 | lowland | with in average acceptability threshold/marginal | 6.11      |
| 127 | lowland | with in average acceptability threshold/marginal | 6.65      |
| 128 | lowland | satisfactory/good for consumption/GMP            | 2.09      |
| 129 | lowland | satisfactory/good for consumption/GMP            | 2.26      |
| 130 | lowland | with in average acceptability threshold/marginal | 6.33      |
| 131 | lowland | unsatisfactory                                   | 7.21      |
| 132 | lowland | with in average acceptability threshold/marginal | 6.97      |
| 133 | lowland | with in average acceptability threshold/marginal | 6.32      |
| 134 | lowland | with in average acceptability threshold/marginal | 5.93      |
| 135 | lowland | unsatisfactory                                   | 7.09      |
| 136 | lowland | unsatisfactory                                   | 7.08      |
| 137 | lowland | with in average acceptability threshold/marginal | 5.75      |
| 138 | lowland | satisfactory/good for consumption/GMP            | 2.99      |
| 139 | lowland | satisfactory/good for consumption/GMP            | 3.32      |
| 140 | lowland | satisfactory/good for consumption/GMP            | 3.45      |

**Supplementary material**

|                                                  | meanlogTSC | presence of S aureus |
|--------------------------------------------------|------------|----------------------|
| SA count                                         |            |                      |
| potentially harmful                              | 4.74       | present              |
| satisfactory/good for consumption/GMP            | x?2        | absent               |
| unsatisfactory                                   | 3.71       | present              |
| satisfactory/good for consumption/GMP            | x?2        | absent               |
| with in average acceptability threshold/marginal | 2.34       | present              |
| satisfactory/good for consumption/GMP            | x?2        | absent               |
| satisfactory/good for consumption/GMP            | 0.54       | present              |
| potentially harmful                              | 4.67       | present              |
| with in average acceptability threshold/marginal | 2.56       | present              |
| satisfactory/good for consumption/GMP            | x?2        | absent               |
| with in average acceptability threshold/marginal | 2.45       | present              |
| satisfactory/good for consumption/GMP            | x?2        | absent               |
| unsatisfactory                                   | 3.78       | present              |
| satisfactory/good for consumption/GMP            | x?2        | absent               |
| with in average acceptability threshold/marginal | 2.43       | present              |
| satisfactory/good for consumption/GMP            | x?2        | absent               |
| with in average acceptability threshold/marginal | 2.98       | present              |
| satisfactory/good for consumption/GMP            | x?2        | absent               |
| unsatisfactory                                   | 3.99       | present              |
| satisfactory/good for consumption/GMP            | x?2        | absent               |
| satisfactory/good for consumption/GMP            | x?2        | absent               |
| satisfactory/good for consumption/GMP            | x?2        | absent               |
| with in average acceptability threshold/marginal | 3.7<x<4.7  | present              |
| unsatisfactory                                   | 4          | present              |
| satisfactory/good for consumption/GMP            | x?2        | absent               |
| satisfactory/good for consumption/GMP            | x?2        | absent               |
| satisfactory/good for consumption/GMP            | x?2        | absent               |
| unsatisfactory                                   | 3.31       | present              |
| satisfactory/good for consumption/GMP            | x?2        | absent               |
| with in average acceptability threshold/marginal | 2.09       | present              |
| with in average acceptability threshold/marginal | 2.87       | present              |
| satisfactory/good for consumption/GMP            | x?2        | absent               |
| with in average acceptability threshold/marginal | 2.1        | present              |
| satisfactory/good for consumption/GMP            | x?2        | absent               |
| with in average acceptability threshold/marginal | 2.54       | present              |
| satisfactory/good for consumption/GMP            | x?2        | absent               |
| with in average acceptability threshold/marginal | 2.88       | present              |
| with in average acceptability threshold/marginal | 2.86       | present              |
| unsatisfactory                                   | x?2        | absent               |
| satisfactory/good for consumption/GMP            | x?2        | absent               |
| satisfactory/good for consumption/GMP            | x?2        | absent               |
| unsatisfactory                                   | 3.77       | present              |
| unsatisfactory                                   | 3.71       | present              |
| satisfactory/good for consumption/GMP            | x?2        | absent               |
| unsatisfactory                                   | 3.99       | present              |
| with in average acceptability threshold/marginal | 2.19       | present              |
| with in average acceptability threshold/marginal | 2.88       | present              |

|                                                  |              |
|--------------------------------------------------|--------------|
| satisfactory/good for consumption/GMP            | x?2 absent   |
| satisfactory/good for consumption/GMP            | x?2 absent   |
| with in average acceptability threshold/marginal | 2.18 present |
| satisfactory/good for consumption/GMP            | x?2 absent   |
| potentially harmful                              | 4.77 present |
| unsatisfactory                                   | 3.12 present |
| potentially harmful                              | 4.33 present |
| satisfactory/good for consumption/GMP            | x?2 absent   |
| satisfactory/good for consumption/GMP            | x?2 absent   |
| satisfactory/good for consumption/GMP            | x?2 absent   |
| potentially harmful                              | 4.01 present |
| satisfactory/good for consumption/GMP            | x?2 absent   |
| satisfactory/good for consumption/GMP            | x?2 absent   |
| satisfactory/good for consumption/GMP            | x?2 absent   |
| potentially harmful                              | 4.06 present |
| satisfactory/good for consumption/GMP            | x?2 absent   |
| potentially harmful                              | 4.55 present |
| satisfactory/good for consumption/GMP            | x?2 absent   |
| satisfactory/good for consumption/GMP            | x?2 absent   |
| satisfactory/good for consumption/GMP            | x?2 absent   |
| potentially harmful                              | 4.54 present |
| satisfactory/good for consumption/GMP            | x?2 absent   |
| satisfactory/good for consumption/GMP            | x?2 absent   |
| satisfactory/good for consumption/GMP            | x?2 absent   |
| satisfactory/good for consumption/GMP            | x?2 absent   |
| with in average acceptability threshold/marginal | x?2 absent   |
| satisfactory/good for consumption/GMP            | x?2 absent   |
| with in average acceptability threshold/marginal | 2.76 present |
| satisfactory/good for consumption/GMP            | x?2 absent   |
| unsatisfactory                                   | 3.76 present |
| satisfactory/good for consumption/GMP            | x?2 absent   |
| satisfactory/good for consumption/GMP            | x?2 absent   |
| with in average acceptability threshold/marginal | 2.18 present |
| satisfactory/good for consumption/GMP            | x?2 absent   |
| satisfactory/good for consumption/GMP            | x?2 absent   |
| satisfactory/good for consumption/GMP            | x?2 absent   |
| satisfactory/good for consumption/GMP            | x?2 absent   |
| potentially harmful                              | 4.35 present |
| satisfactory/good for consumption/GMP            | x?2 absent   |
| satisfactory/good for consumption/GMP            | x?2 absent   |
| potentially harmful                              | 4.66 present |
| satisfactory/good for consumption/GMP            | x?2 absent   |
| unsatisfactory                                   | 3.34 present |
| satisfactory/good for consumption/GMP            | x?2 absent   |
| satisfactory/good for consumption/GMP            | x?2 absent   |
| potentially harmful                              | 4.99 present |
| satisfactory/good for consumption/GMP            | x?2 absent   |
| satisfactory/good for consumption/GMP            | 1.93 present |
| satisfactory/good for consumption/GMP            | x?2 absent   |
| satisfactory/good for consumption/GMP            | x?2 absent   |

|                                                  |              |
|--------------------------------------------------|--------------|
| potentially harmful                              | 4.29 present |
| satisfactory/good for consumption/GMP            | x?2 absent   |
| satisfactory/good for consumption/GMP            | x?2 absent   |
| potentially harmful                              | 4.11 present |
| satisfactory/good for consumption/GMP            | x?2 absent   |
| satisfactory/good for consumption/GMP            | x?2 absent   |
| satisfactory/good for consumption/GMP            | x?2 absent   |
| unsatisfactory                                   | 3.91 present |
| satisfactory/good for consumption/GMP            | x?2 absent   |
| satisfactory/good for consumption/GMP            | x?2 absent   |
| satisfactory/good for consumption/GMP            | 1.76 present |
| satisfactory/good for consumption/GMP            | x?2 absent   |
| satisfactory/good for consumption/GMP            | x?2 absent   |
| satisfactory/good for consumption/GMP            | x?2 absent   |
| potentially harmful                              | 4.01 present |
| satisfactory/good for consumption/GMP            | x?2 absent   |
| satisfactory/good for consumption/GMP            | x?2 absent   |
| with in average acceptability threshold/marginal | 2.43 present |
| satisfactory/good for consumption/GMP            | x?2 absent   |
| with in average acceptability threshold/marginal | 2.59 present |
| satisfactory/good for consumption/GMP            | x?2 absent   |
| satisfactory/good for consumption/GMP            | x?2 absent   |
| potentially harmful                              | 4.21 present |
| satisfactory/good for consumption/GMP            | x?2 absent   |
| with in average acceptability threshold/marginal | 2.45 present |
| satisfactory/good for consumption/GMP            | x?2 absent   |
| satisfactory/good for consumption/GMP            | x?2 absent   |
| satisfactory/good for consumption/GMP            | x?2 absent   |
| with in average acceptability threshold/marginal | 2.76 present |
| satisfactory/good for consumption/GMP            | x?2 absent   |
| with in average acceptability threshold/marginal | 2.49 present |
| satisfactory/good for consumption/GMP            | x?2 absent   |
| satisfactory/good for consumption/GMP            | x?2 absent   |
| with in average acceptability threshold/marginal | 2.99 present |
| satisfactory/good for consumption/GMP            | x?2 absent   |
| potentially harmful                              | 4.38 present |
| with in average acceptability threshold/marginal | 2.09 present |
| with in average acceptability threshold/marginal | 2.43 present |
| with in average acceptability threshold/marginal | 2.64 present |
| with in average acceptability threshold/marginal | 2.76 present |
| satisfactory/good for consumption/GMP            | x?2 absent   |
| satisfactory/good for consumption/GMP            | x?2 absent   |
| unsatisfactory                                   | 3.87 present |

| S.aurous response to PEN | S.aureus response to CXT | S.aureus response to Gen |
|--------------------------|--------------------------|--------------------------|
| resistance               | susceptible              | resistance               |
| no pathogen              | no pathogen              | no pathogen              |
| no pathogen              | no pathogen              | no pathogen              |
| susceptible              | susceptible              | susceptible              |
| resistance               | resistance               | resistance               |
| no pathogen              | no pathogen              | no pathogen              |
| resistance               | resistance               | resistance               |
| no pathogen              | no pathogen              | no pathogen              |
| resistance               | susceptible              | resistance               |
| no pathogen              | no pathogen              | no pathogen              |
| resistance               | resistance               | susceptible              |
| no pathogen              | no pathogen              | no pathogen              |
| resistance               | resistance               | resistance               |
| no pathogen              | no pathogen              | no pathogen              |
| resistance               | resistance               | resistance               |
| no pathogen              | no pathogen              | no pathogen              |
| resistance               | resistance               | no pathogen              |
| no pathogen              | no pathogen              | susceptible              |
| resistance               | resistance               | no pathogen              |
| susceptible              | susceptible              | resistance               |
| no pathogen              | no pathogen              | susceptible              |
| resistance               | resistance               | no pathogen              |
| susceptible              | resistance               | susceptible              |
| no pathogen              | no pathogen              | resistance               |
| resistance               | resistance               | no pathogen              |
| resistance               | resistance               | susceptible              |
| no pathogen              | no pathogen              | no pathogen              |
| resistance               | resistance               | resistance               |
| no pathogen              | no pathogen              | no pathogen              |
| resistance               | no pathogen              | no pathogen              |
| no pathogen              | susceptible              | resistance               |
| no pathogen              | no pathogen              | no pathogen              |
| resistance               | resistance               | resistance               |
| resistance               | resistance               | susceptible              |
| no pathogen              | no pathogen              | no pathogen              |
| no pathogen              | no pathogen              | no pathogen              |
| resistance               | resistance               | no pathogen              |
| susceptible              | susceptible              | resistance               |
| no pathogen              | no pathogen              | susceptible              |
| resistance               | resistance               | no pathogen              |
| resistance               | resistance               | resistance               |
| resistance               | resistance               | susceptible              |



















| sex of the respondant | educational status of workers on milk | training of workers |
|-----------------------|---------------------------------------|---------------------|
| female                | 01-Aug                                | no                  |
| female                | college and above                     | no                  |
| female                | ilietrate                             | no                  |
| female                | 09-Dec                                | no                  |
| female                | 01-Aug                                | no                  |
| female                | 01-Aug                                | no                  |
| female                | 01-Aug                                | no                  |
| female                | ilietrate                             | no                  |
| male                  | 01-Aug                                | no                  |
| male                  | college and above                     | no                  |
| male                  | 01-Aug                                | no                  |
| male                  | 01-Aug                                | no                  |
| female                | 01-Aug                                | no                  |
| female                | 09-Dec                                | no                  |
| female                | 01-Aug                                | no                  |
| female                | college and above                     | no                  |
| male                  | ilietrate                             | no                  |
| male                  | 01-Aug                                | no                  |
| male                  | 01-Aug                                | no                  |
| male                  | 01-Aug                                | no                  |
| female                | 01-Aug                                | no                  |
| female                | 09-Dec                                | no                  |
| female                | 01-Aug                                | no                  |
| female                | 01-Aug                                | no                  |
| female                | 09-Dec                                | no                  |
| female                | 01-Aug                                | no                  |
| female                | college and above                     | no                  |
| female                | 01-Aug                                | no                  |
| male                  | 01-Aug                                | no                  |
| male                  | ilietrate                             | no                  |
| male                  | 01-Aug                                | no                  |
| male                  | 09-Dec                                | no                  |
| female                | 01-Aug                                | no                  |
| female                | 01-Aug                                | no                  |
| female                | 01-Aug                                | no                  |
| female                | 01-Aug                                | no                  |
| female                | ilietrate                             | no                  |
| female                | 01-Aug                                | no                  |
| female                | 01-Aug                                | no                  |
| female                | college and above                     | no                  |
| female                | 09-Dec                                | no                  |
| female                | 01-Aug                                | no                  |
| female                | 01-Aug                                | no                  |
| female                | college and above                     | no                  |
| female                | 01-Aug                                | no                  |
| female                | ilietrate                             | no                  |
| female                | 01-Aug                                | no                  |



|        |                   |     |
|--------|-------------------|-----|
| female | 01-Aug            | no  |
| male   | 09-Dec            | no  |
| male   | 01-Aug            | no  |
| male   | 01-Aug            | no  |
| male   | 01-Aug            | no  |
| male   | 01-Aug            | no  |
| male   | iliterate         | no  |
| male   | college and above | no  |
| male   | 09-Dec            | no  |
| female | 01-Aug            | no  |
| female | iliterate         | no  |
| female | college and above | no  |
| female | 01-Aug            | no  |
| male   | 09-Dec            | no  |
| male   | iliterate         | no  |
| male   | 01-Aug            | no  |
| male   | 01-Aug            | no  |
| female | 09-Dec            | no  |
| female | 01-Aug            | no  |
| female | 01-Aug            | no  |
| female | iliterate         | no  |
| female | college and above | no  |
| female | 01-Aug            | no  |
| female | 09-Dec            | no  |
| female | 01-Aug            | no  |
| male   | 01-Aug            | yes |
| male   | 01-Aug            | no  |
| male   | 01-Aug            | no  |
| male   | college and above | no  |
| male   | 01-Aug            | no  |
| male   | 09-Dec            | no  |
| male   | 01-Aug            | yes |
| male   | iliterate         | no  |
| female | 01-Aug            | no  |
| female | 09-Dec            | no  |
| female | 09-Dec            | no  |
| female | 01-Aug            | no  |
| female | 01-Aug            | no  |
| female | 01-Aug            | no  |
| female | iliterate         | no  |
| female | 01-Aug            | no  |
| male   | college and above | yes |
| male   | 01-Aug            | no  |
| male   | 01-Aug            | no  |
| male   | 09-Dec            | no  |
| female | 01-Aug            | no  |
| female | 01-Aug            | no  |
| female | college and above | no  |
| female | 09-Dec            | yes |
| female | 01-Aug            | no  |

|        |                   |     |
|--------|-------------------|-----|
| female | 01-Aug            | no  |
| female | 01-Aug            | no  |
| female | 09-Dec            | no  |
| female | ilietrate         | no  |
| female | college and above | no  |
| female | 01-Aug            | yes |
| female | 01-Aug            | no  |
| female | 09-Dec            | no  |
| female | 01-Aug            | no  |
| female | 01-Aug            | no  |
| female | ilietrate         | no  |
| male   | 09-Dec            | yes |
| male   | 01-Aug            | no  |
| male   | 01-Aug            | no  |
| male   | 01-Aug            | no  |
| female | 01-Aug            | no  |
| female | college and above | yes |
| female | ilietrate         | no  |
| female | college and above | no  |
| female | ilietrate         | no  |
| female | 09-Dec            | no  |
| female | college and above | yes |
| female | 01-Aug            | no  |
| male   | college and above | no  |
| male   | 01-Aug            | no  |
| male   | ilietrate         | no  |
| male   | college and above | yes |
| female | 09-Dec            | no  |
| female | 01-Aug            | no  |
| female | 09-Dec            | yes |
| female | ilietrate         | no  |
| female | 01-Aug            | no  |
| female | college and above | no  |
| female | 01-Aug            | no  |
| female | 09-Dec            | yes |
| female | 01-Aug            | no  |
| female | ilietrate         | no  |
| female | 01-Aug            | no  |
| female | 09-Dec            | no  |
| male   | 01-Aug            | no  |
| male   | college and above | yes |
| male   | 01-Aug            | no  |
| male   | 01-Aug            | no  |





|     |     |     |
|-----|-----|-----|
| no  | yes | no  |
| no  | no  | no  |
| no  | no  | no  |
| no  | no  | no  |
| no  | no  | no  |
| no  | no  | no  |
| no  | no  | no  |
| no  | no  | no  |
| no  | no  | no  |
| no  | no  | no  |
| no  | no  | no  |
| yes | no  | no  |
| yes | no  | no  |
| yes | yes | no  |
| yes | yes | no  |
| no  | yes | no  |
| no  | yes | no  |
| no  | no  | no  |
| no  | no  | no  |
| no  | no  | no  |
| no  | no  | no  |
| no  | no  | no  |
| no  | no  | no  |
| no  | no  | no  |
| no  | no  | no  |
| yes | no  | yes |
| yes | no  | yes |
| yes | no  | yes |
| yes | no  | yes |
| no  | no  | no  |
| no  | no  | no  |
| no  | no  | no  |
| no  | no  | no  |
| no  | no  | no  |
| no  | no  | no  |
| no  | no  | no  |
| no  | yes | no  |
| no  | yes | no  |
| yes | yes | yes |
| yes | yes | yes |
| yes | no  | yes |
| yes | no  | yes |
| no  | no  | no  |
| no  | no  | no  |
| no  | no  | no  |
| no  | no  | no  |

nose picking habit of the workers during working

no

yes

yes

yes

no

yes

yes

no

no

yes

no

yes

no

yes

no

yes

yes

yes

yes

no

yes

yes

no

yes

no

no

yes

yes

yes

no

no

yes

no

yes

no

yes

no

no

yes

yes

yes

yes

no

yes

no

no

no

washing hands before and after

water

water

water

water

water

detergent with water

water

water

water

water

water

detergent with water

water

water

water

water

water

water

water

water

detergent with water

water

detergent with water

water

detergent with water

detergent with water

detergent with water

water

detergent with water

water

detergent with water

detergent with water

water

water

water

detergent with water

detergent with water

detergent with water

water

detergent with water

detergent with water

water

water

detergent with water

detergent with water

water

water

|     |                      |
|-----|----------------------|
| yes | detergent with water |
| yes | water                |
| no  | water                |
| yes | detergent with water |
| no  | water                |
| yes | water                |
| yes | detergent with water |
| yes | detergent with water |
| yes | water                |
| yes | detergent with water |
| no  | water                |
| yes | detergent with water |
| yes | detergent with water |
| yes | water                |
| no  | water                |
| yes | detergent with water |
| no  | water                |
| yes | detergent with water |
| no  | detergent with water |
| yes | detergent with water |
| no  | water                |
| yes | detergent with water |
| no  | detergent with water |
| yes | detergent with water |
| no  | water                |
| yes | detergent with water |
| no  | water                |
| yes | water                |
| no  | water                |
| yes | water                |
| no  | water                |
| yes | water                |
| no  | water                |
| yes | detergent with water |
| yes | water                |
| no  | water                |
| yes | detergent with water |
| no  | water                |
| yes | detergent with water |
| no  | water                |

|     |                      |
|-----|----------------------|
| no  | water                |
| yes | detergent with water |
| yes | detergent with water |
| no  | water                |
| yes | detergent with water |
| no  | detergent with water |
| no  | water                |
| yes | water                |
| yes | detergent with water |
| no  | detergent with water |
| no  | water                |
| yes | detergent with water |
| yes | water                |
| yes | detergent with water |
| no  | water                |
| yes | detergent with water |
| yes | detergent with water |
| yes | water                |
| no  | water                |
| yes | water                |
| no  | detergent with water |
| yes | detergent with water |
| yes | detergent with water |
| yes | water                |
| no  | detergent with water |
| yes | water                |
| no  | water                |
| no  | detergent with water |
| no  | detergent with water |
| yes | water                |
| yes | detergent with water |
| yes | water                |
| yes | detergent with water |
| no  | water                |
| yes | water                |
| no  | water                |
| no  | detergent with water |
| yes | detergent with water |
| no  | detergent with water |



|                         |                        |                          |
|-------------------------|------------------------|--------------------------|
| cleaning milk container | abnormal milk checking | milk container           |
| detergent with water    | no                     | plastic                  |
| detergent with water    | yes                    | plastic                  |
| water                   | no                     | plastic                  |
| detergent with water    | yes                    | aluminium coated vessels |
| water                   | no                     | plastic                  |
| detergent with water    | yes                    | plastic                  |
| water                   | yes                    | plastic                  |
| water                   | no                     | plastic                  |
| detergent with water    | yes                    | plastic                  |
| water                   | no                     | plastic                  |
| detergent with water    | yes                    | plastic                  |
| water                   | no                     | plastic                  |
| detergent with water    | yes                    | plastic                  |
| water                   | no                     | plastic                  |
| detergent with water    | yes                    | aluminium coated vessels |
| water                   | no                     | plastic                  |
| detergent with water    | yes                    | plastic                  |
| detergent with water    | yes                    | plastic                  |
| detergent with water    | yes                    | plastic                  |
| water                   | no                     | plastic                  |
| detergent with water    | no                     | plastic                  |
| detergent with water    | yes                    | aluminium coated vessels |
| water                   | yes                    | plastic                  |
| detergent with water    | yes                    | aluminium coated vessels |
| water                   | yes                    | aluminium coated vessels |
| detergent with water    | yes                    | aluminium coated vessels |
| water                   | yes                    | aluminium coated vessels |
| detergent with water    | yes                    | plastic                  |
| water                   | yes                    | plastic                  |
| detergent with water    | yes                    | plastic                  |
| detergent with water    | no                     | plastic                  |
| detergent with water    | yes                    | aluminium coated vessels |
| detergent with water    | yes                    | aluminium coated vessels |
| water                   | yes                    | plastic                  |
| water                   | no                     | plastic                  |
| detergent with water    | yes                    | aluminium coated vessels |
| water                   | no                     | plastic                  |
| water                   | yes                    | plastic                  |
| water                   | no                     | plastic                  |

|                      |     |                          |
|----------------------|-----|--------------------------|
| detergent with water | yes | plastic                  |
| detergent with water | yes | plastic                  |
| water                | yes | aluminium coated vessels |
| detergent with water | yes | plastic                  |
| water                | yes | aluminium coated vessels |
| water                | yes | plastic                  |
| water                | no  | plastic                  |
| detergent with water | yes | aluminium coated vessels |
| detergent with water | yes | aluminium coated vessels |
| detergent with water | yes | aluminium coated vessels |
| water                | no  | plastic                  |
| detergent with water | yes | plastic                  |
| detergent with water | yes | plastic                  |
| detergent with water | yes | aluminium coated vessels |
| water                | no  | plastic                  |
| detergent with water | yes | plastic                  |
| water                | no  | aluminium coated vessels |
| detergent with water | yes | aluminium coated vessels |
| detergent with water | no  | plastic                  |
| detergent with water | yes | plastic                  |
| water                | no  | plastic                  |
| detergent with water | yes | aluminium coated vessels |
| detergent with water | no  | plastic                  |
| detergent with water | yes | plastic                  |
| detergent with water | yes | aluminium coated vessels |
| water                | yes | plastic                  |
| water                | yes | plastic                  |
| detergent with water | yes | aluminium coated vessels |
| water                | no  | plastic                  |
| detergent with water | yes | plastic                  |
| detergent with water | yes | aluminium coated vessels |
| water                | no  | plastic                  |
| detergent with water | yes | plastic                  |
| water                | no  | plastic                  |
| detergent with water | yes | aluminium coated vessels |
| water                | no  | plastic                  |
| detergent with water | yes | plastic                  |
| water                | no  | aluminium coated vessels |
| detergent with water | yes | plastic                  |
| water                | no  | plastic                  |

|                      |     |                          |
|----------------------|-----|--------------------------|
| water                | no  | plastic                  |
| water                | no  | plastic                  |
| detergent with water | yes | aluminium coated vessels |
| water                | no  | plastic                  |
| detergent with water | yes | aluminium coated vessels |
| detergent with water | yes | plastic                  |
| water                | yes | plastic                  |
| water                | yes | plastic                  |
| detergent with water | yes | plastic                  |
| detergent with water | yes | aluminium coated vessels |
| water                | no  | plastic                  |
| detergent with water | yes | aluminium coated vessels |
| water                | no  | aluminium coated vessels |
| detergent with water | yes | plastic                  |
| water                | no  | plastic                  |
| water                | yes | aluminium coated vessels |
| detergent with water | yes | aluminium coated vessels |
| water                | yes | plastic                  |
| detergent with water | yes | aluminium coated vessels |
| detergent with water | no  | plastic                  |
| water                | yes | aluminium coated vessels |
| detergent with water | no  | plastic                  |
| water                | yes | plastic                  |
| detergent with water | yes | aluminium coated vessels |
| detergent with water | no  | plastic                  |
| water                | yes | plastic                  |
| detergent with water | yes | aluminium coated vessels |
| detergent with water | yes | plastic                  |
| water                | no  | plastic                  |
| water                | yes | plastic                  |
| detergent with water | no  | plastic                  |
| water                | no  | aluminium coated vessels |
| detergent with water | yes | plastic                  |
| detergent with water | yes | plastic                  |
| water                | no  | plastic                  |
| detergent with water | yes | aluminium coated vessels |
| water                | no  | aluminium coated vessels |
| water                | no  | plastic                  |
